# Supplementary material for: Quantification of Salmonella Typhimurium in liquid food using NanoGene assay
Source: Royal Society of Chemistry journal article supplement (doi:10.1039/c5ay01486g), 2015-01-01
Supplement: c5ay01486g1.pdf [file c5ay01486g1.pdf]

*Supporting Information*

**Quantification of *Salmonella* Typhimurium in liquid foods using NanoGene  
assay**

Joo-Myung Ahn<sup>1</sup> and Ahjeong Son<sup>2\*</sup>

<sup>1</sup>Department of Civil Engineering, Auburn University, Auburn, AL 36849, USA

<sup>2</sup>Department of Environmental Science and Engineering, Ewha Womans University, Seoul,  
Korea

\*Corresponding author. Address: 52 Ewhayeodae-gil, Seodaemun-gu, Seoul, 120-750, Korea;

E-mail: ahjeong.son@gmail.com; Phone: +82 (2) 3277-3339; Fax: +82 (2) 3277-3275

20

21

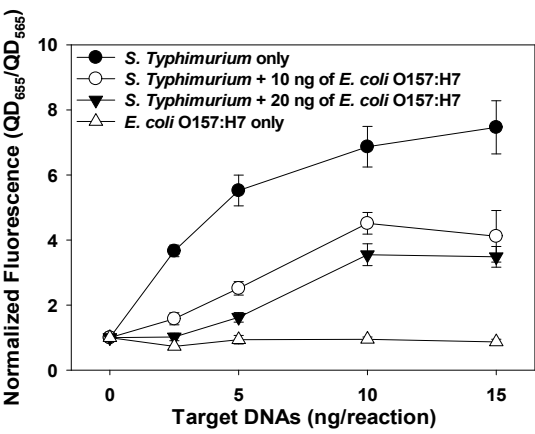

22

23 Figure S1. Specificity test for the detection of *S. Typhimurium* in the presence of other bacterium.

24

25

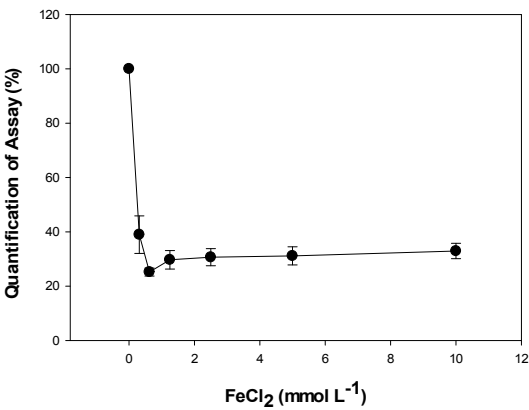

26

27 Figure S2. The inhibitory effect on the gene quantification by ferrous ion.
